# Supplementary material
Source: PubMed Central journal article supplement (PMC4879421)
Supplement: AAC.00581-16_zac007165265so1.pdf [file AAC.00581-16_zac007165265so1.pdf]

## **Supplemental material:**

### **Barrier-independent, fitness-associated differences in sofosbuvir-efficacy against hepatitis C virus**

**Isabel Gallego<sup>1,2</sup>, Julie Sheldon<sup>1</sup>, Elena Moreno<sup>1</sup>, Josep Gregori<sup>2,3,4</sup>, Josep Quer<sup>2,3,5</sup>,  
Juan Ignacio Esteban<sup>2,3,5</sup>, Charles M. Rice<sup>6</sup>, Esteban Domingo<sup>1,2</sup> and Celia  
Perales<sup>1,2,3</sup>\***

<sup>1</sup>*Centro de Biología Molecular “Severo Ochoa” (CSIC-UAM), Consejo Superior de  
Investigaciones Científicas (CSIC), Campus de Cantoblanco, 28049, Madrid, Spain,*

<sup>2</sup>*Centro de Investigación Biomédica en Red de Enfermedades Hepáticas y Digestivas  
(CIBERehd), Barcelona, Spain,*

<sup>3</sup>*Liver Unit, Internal Medicine, Laboratory of Malalties Hepàtiques, Vall d’Hebron  
Institut de Recerca-Hospital Universitari Vall d’Hebron, (VHIR-HUVH), Universitat  
Autònoma de Barcelona, 08035, Barcelona, Spain,*

<sup>4</sup>*Roche Diagnostics, S.L., Sant Cugat del Vallés, Spain,*

<sup>5</sup>*Universitat Autònoma de Barcelona, Barcelona, Spain,*

<sup>6</sup>*Center for the Study of Hepatitis C, Laboratory of Virology and Infectious Disease,  
The Rockefeller University, New York, USA.*

*\*Corresponding author*

Celia Perales

Centro de Biología Molecular “Severo Ochoa” (CSIC-UAM), Consejo Superior de  
Investigaciones Científicas (CSIC), Campus de Cantoblanco, 28049, Madrid, Spain

E-mail: [cperales@cbm.csic.es](mailto:cperales@cbm.csic.es), [celia.perales@vhir.org](mailto:celia.perales@vhir.org)

Telephone number: +34 91 196 45 41; Fax: +34 91 196 44 20

**Table S1.** Mutations, and corresponding amino acid of the NS5B-coding region in the consensus sequence of HCV p45 and HCV p100 after five and ten passages in the absence and presence of sofosbuvir (SOF) 800 nM and 1200 nM<sup>a</sup>

| HCV population [number of passages] <sup>a</sup> | No drug               |                                      | SOF 800 nM            |                                      | SOF 1200 nM           |                                      |
|--------------------------------------------------|-----------------------|--------------------------------------|-----------------------|--------------------------------------|-----------------------|--------------------------------------|
|                                                  | Mutation <sup>b</sup> | Amino acid substitution <sup>b</sup> | Mutation <sup>b</sup> | Amino acid substitution <sup>b</sup> | Mutation <sup>b</sup> | Amino acid substitution <sup>b</sup> |
| HCV p45                                          | T7842T/C              | V59V/A                               |                       |                                      |                       |                                      |
|                                                  | C8842T                | Syn                                  |                       | -                                    |                       | -                                    |
|                                                  | T8962A                | Syn                                  |                       |                                      |                       |                                      |
| HCV p45 [p5]                                     | T7842T/C              | V59V/A                               | T7842C/T              | V59A/V                               | T7842C                | V59A                                 |
|                                                  | C8842T                | Syn                                  | T8092C                | Syn                                  | A8531T                | M289L                                |
|                                                  | T8962A                | Syn                                  | A8521G                | Syn                                  | C8842T                | Syn                                  |
|                                                  |                       |                                      | A8531T                | M289L                                | T8962A                | Syn                                  |
|                                                  |                       |                                      | C8842T                | Syn                                  |                       |                                      |
| HCV p45 [p10]                                    | T7842C/T              | V59A/V                               | C7714C/T*             | Syn*                                 | T7842C                | V59A                                 |
|                                                  | A8427A/G*             | H254H/R*                             | T7842C                | V59A                                 | A8201A/G*             | T179T/A*                             |
|                                                  | C8575C/T*             | Syn*                                 | T8092C                | Syn                                  | A8531T                | M289L                                |
|                                                  | C8842T                | Syn                                  | A8521G                | Syn                                  | C8842T                | Syn                                  |
|                                                  | T8962A                | Syn                                  | A8531T                | M289L                                | T8962A                | Syn                                  |
|                                                  |                       |                                      | C8842T                | Syn                                  |                       |                                      |
|                                                  |                       |                                      | T9380C                | Syn                                  |                       |                                      |
| HCV p100                                         | T7842T/C*             | V59V/A*                              |                       |                                      |                       |                                      |
|                                                  | A8201G/A              | T179A/T                              |                       |                                      |                       |                                      |
|                                                  | A8263G                | Syn                                  |                       |                                      |                       |                                      |
|                                                  | T8310C                | M215T                                |                       |                                      |                       |                                      |
|                                                  | C8842T                | Syn                                  |                       | -                                    |                       | -                                    |
|                                                  | C8854A/C              | Syn                                  |                       |                                      |                       |                                      |
|                                                  | T8962A                | Syn                                  |                       |                                      |                       |                                      |
|                                                  | T9014G/T              | S450A/S                              |                       |                                      |                       |                                      |
| C9385G/C                                         | Syn                   |                                      |                       |                                      |                       |                                      |
| HCV p100 [p5]                                    | T7727T/C*             | Syn*                                 | T7842T/C*             | V59V/A*                              | C7948C/T              | Syn                                  |
|                                                  | T7842T/C*             | V59V/A*                              | A8201G/A              | T179A/T                              | A8201G                | T179A                                |
|                                                  | A8263G                | Syn                                  | A8263G                | Syn                                  | A8263G                | Syn                                  |
|                                                  | T8310C                | M215T                                | T8310C                | M215T                                | T8310C                | M215T                                |
|                                                  | C8842T                | Syn                                  | C8842T                | Syn                                  | A8530A/T              | M289M/L                              |
|                                                  | T8962A                | Syn                                  | C8854A/C              | Syn                                  | C8842T                | Syn                                  |
|                                                  | T9014G/T              | S450A/S                              | T8962A                | Syn                                  | C8854A                | Syn                                  |
|                                                  | C9364C/T*             | Syn*                                 | T9014G/T              | S450A/S                              | T8962A                | Syn                                  |
|                                                  | C9385C/G*             | Syn*                                 | C9385G/C              | Syn                                  | T9014G                | S450A                                |
|                                                  |                       |                                      |                       | C9385G/C                             | Syn                   |                                      |
| HCV p100 [p10]                                   | C7678C/T*             | Syn*                                 | T7842C                | V59A                                 |                       | NO VIRUS ISOLATED                    |
|                                                  | T7842T/C*             | V59V/A*                              | A8531T                | M289L                                |                       |                                      |
|                                                  | T7942T/C*             | Syn*                                 | C8842T                | Syn                                  |                       |                                      |
|                                                  | G8209T/G              | K181N/K                              | T8962A                | Syn                                  |                       |                                      |
|                                                  | A8263A/G              | Syn                                  |                       |                                      |                       |                                      |
|                                                  | T8310C/T              | M215T/M                              |                       |                                      |                       |                                      |
|                                                  | T8722T/A*             | D352D/E*                             |                       |                                      |                       |                                      |
|                                                  | A8758A/G              | Syn                                  |                       |                                      |                       |                                      |

|  |           |         |  |  |
|--|-----------|---------|--|--|
|  | C8842T    | Syn     |  |  |
|  | C8854C/A* | Syn*    |  |  |
|  | T8884T/C  | Syn     |  |  |
|  | T8962A    | Syn     |  |  |
|  | T9014T/G  | S450S/A |  |  |
|  | C9364C/T* | Syn*    |  |  |
|  | C9385C/G  | Syn     |  |  |

<sup>a</sup>The sequence of the NS5B-coding region was determined for HCV p45 and HCV p100 after 5 and 10 passages in the absence and presence of SOF 800 nM and 1200 nM. The populations are those described in Figures 2 and 3 of the main text.

<sup>b</sup>Mutations and deduced amino acid substitutions are relative to the sequence of the JFH-1 (accession number AB047639). Amino acid residues (single-letter code) are numbered individually for each protein from the N-to the C-terminus. Boldface type indicates a resistant mutation previously described. Two residues separated by a bar indicate a mixture of two nucleotides in the population, according to the sequence band pattern. Asterisks indicate a proportion of the mutant lower than 25%. Procedures for nucleotide sequencing are described in Materials and Methods.

**Table S2.** Mutations, and corresponding amino acid of the NS5B-coding region in the consensus sequence of HCV p0, HCV p45 and HCV p100 biological clones after one, three or five passages in the absence and presence of sofosbuvir (SOF) 800 nM<sup>a</sup>

| HCV population<br>[number of passages] <sup>a</sup> | No drug               |                                      | SOF 800 nM            |                                      |
|-----------------------------------------------------|-----------------------|--------------------------------------|-----------------------|--------------------------------------|
|                                                     | Mutation <sup>b</sup> | Amino acid substitution <sup>b</sup> | Mutation <sup>b</sup> | Amino acid substitution <sup>b</sup> |
| HCV p0 CB2                                          | A7696G                | Syn                                  | -                     |                                      |
|                                                     | A8201G                | T179A                                |                       |                                      |
| HCV p0 CB2 [p3]                                     | A7696G                | Syn                                  | A7696G                | Syn                                  |
|                                                     | C7714C/T*             | Syn*                                 | A8201G                | T179A                                |
|                                                     | A8201G                | T179A                                | G8586G/A*             | G307G/D*                             |
| HCV p45 CB2                                         | T8200C                | Syn                                  | -                     |                                      |
|                                                     | A8629G                | Syn                                  |                       |                                      |
|                                                     | C8842T                | Syn                                  |                       |                                      |
|                                                     | T8962A                | Syn                                  |                       |                                      |
|                                                     | G9416A                | G584S                                |                       |                                      |
| HCV p45 CB2 [p3]                                    | T8200C                | Syn                                  | T8200C                | Syn                                  |
|                                                     | A8629G                | Syn                                  | G8499G/A*             | R278R/H*                             |
|                                                     | C8842T                | Syn                                  | A8629G                | Syn                                  |
|                                                     | T8962A                | Syn                                  | C8842T                | Syn                                  |
|                                                     | G9416A                | G584S                                | T8962A                | Syn                                  |
|                                                     |                       |                                      | G9416A                | G584S                                |
| HCV p45 CB3                                         | C8842T                | Syn                                  | -                     |                                      |
|                                                     | T8962A                | Syn                                  |                       |                                      |
| HCV p45 CB3 [p3]                                    | C8842T                | Syn                                  | C8842T                | Syn                                  |
|                                                     | T8962A                | Syn                                  | T8962A                | Syn                                  |
| HCV p100 CB 4                                       | T7727C                | Syn                                  | -                     |                                      |
|                                                     | C7735T                | Syn                                  |                       |                                      |
|                                                     | T7967C                | Y101H                                |                       |                                      |
|                                                     | A8263G                | Syn                                  |                       |                                      |
|                                                     | T8310C                | M215T                                |                       |                                      |
|                                                     | C8842T                | Syn                                  |                       |                                      |
|                                                     | T8962A                | Syn                                  |                       |                                      |
|                                                     | T9014G                | S450A                                |                       |                                      |
| HCV p100 CB 4 [p3]                                  | T7727C                | Syn                                  | T7727C                | Syn                                  |
|                                                     | C7735T                | Syn                                  | C7735T                | Syn                                  |
|                                                     | T7742T/A*             | L26L/M*                              | A7870A/G              | Syn                                  |
|                                                     | T7967C                | Y101H                                | T7967C                | Y101H                                |
|                                                     | A8263G                | Syn                                  | A8263G                | Syn                                  |
|                                                     | T8310C                | M215T                                | T8310C                | M215T                                |
|                                                     | C8842T                | Syn                                  | A8531A/T              | M289M/L                              |
|                                                     | T8962A                | Syn                                  | C8842T                | Syn                                  |
|                                                     | T9014G                | S450A                                | T8962A                | Syn                                  |
|                                                     |                       |                                      | T9014G                | S450A                                |
| HCV p100 CB 5                                       | T7727C                | Syn                                  | -                     |                                      |
|                                                     | G7898A                | V78I                                 |                       |                                      |
|                                                     | T7954C                | Syn                                  |                       |                                      |

|                           |        |       |        |       |
|---------------------------|--------|-------|--------|-------|
|                           | A8263G | Syn   |        |       |
|                           | T8310C | M215T |        |       |
|                           | T8314G | Syn   |        |       |
|                           | A8626G | Syn   |        |       |
|                           | C8842T | Syn   |        |       |
|                           | T8962A | Syn   |        |       |
|                           | T9014G | S450A |        |       |
|                           | A9235T | Syn   |        |       |
| <b>HCV p100 CB 5 [p3]</b> | T7727C | Syn   | T7727C | Syn   |
|                           | G7898A | V78I  | G7898A | V78I  |
|                           | T7954C | Syn   | T7954C | Syn   |
|                           | A8263G | Syn   | A8263G | Syn   |
|                           | T8310C | M215T | T8310C | M215T |
|                           | T8314G | Syn   | T8314G | Syn   |
|                           | A8626G | Syn   | A8626G | Syn   |
|                           | C8842T | Syn   | C8842T | Syn   |
|                           | T8962A | Syn   | T8962A | Syn   |
|                           | T9014G | S450A | T9014G | S450A |
|                           | A9235T | Syn   | A9235T | Syn   |
| <b>HCV p100 CB 9</b>      | A8263G | Syn   | -      |       |
|                           | T8310C | M215T |        |       |
|                           | C8842T | Syn   |        |       |
|                           | T8962A | Syn   |        |       |
|                           | T9014G | S450A |        |       |
|                           | A9217G | Syn   |        |       |
|                           | C9364T | Syn   |        |       |
| <b>HCV p100 CB 9 [p3]</b> | A8263G | Syn   | T7855C | Syn   |
|                           | T8310C | M215T | A8263G | Syn   |
|                           | C8842T | Syn   | T8310C | M215T |
|                           | T8962A | Syn   | A8531T | M289L |
|                           | T9014G | S450A | C8842T | Syn   |
|                           | A9217G | Syn   | T8962A | Syn   |
|                           | C9364T | Syn   | T9014G | S450A |
|                           |        |       | A9217G | Syn   |
|                           |        |       | C9364T | Syn   |

<sup>a</sup>The sequence of the NS5B-coding region was determined for HCV p0, HCV p45 and HCV p100 biological clones after 3 passages in the absence and presence of SOF 800 nM<sup>a</sup>. The populations are those described in Figures 4 and 5 of the main text.

<sup>b</sup>Mutations and deduced amino acid substitutions are relative to the sequence of the JFH-1 (accession number AB047639). Amino acid residues (single-letter code) are numbered individually for each protein from the N-to the C-terminus. Boldface type

indicates a resistant mutation previously described. Two residues separated by a bar indicate a mixture of two nucleotides in the population, according to the sequence band pattern. Asterisks indicate a proportion of the mutant lower than 25%. Procedures for nucleotide sequencing are described in Materials and Methods.
